# Supplementary material for: Zinc metal complex as a sensor for simultaneous detection of fluoride and HSO4−ions
Source: Royal Society of Chemistry journal article supplement (doi:10.1039/c5dt01063b), 2015-01-01
Supplement: c5dt01063b1.pdf [file c5dt01063b1.pdf]

# ZINC METAL COMPLEX AS SENSOR FOR SIMULTANEOUS DETECTION OF FLUORIDE AND HSO<sub>4</sub><sup>-</sup> IONS

Jasminder Singh<sup>a</sup>, Manisha Yadav<sup>a,b</sup>, Ajnesh Singh<sup>a</sup> and Narinder Singh<sup>a\*</sup>

<sup>a</sup>Department of Chemistry, Indian Institute Technology, Ropar-140 001 (Punjab) India.

<sup>b</sup>Centre of Converging Technologies, University of Rajasthan, Jaipur-302004 (Rajasthan) India.

\* nsingh@iitrpr.ac.in

**Table 1. Crystal data and refinement parameters of N17**

|                                                         |                                                                                 |
|---------------------------------------------------------|---------------------------------------------------------------------------------|
| Compound                                                | <b>N17</b>                                                                      |
| Empirical Formula                                       | C <sub>62</sub> H <sub>60</sub> N <sub>18</sub> O <sub>18</sub> Zn <sub>3</sub> |
| M <sub>w</sub>                                          | 1541.39                                                                         |
| Temperature [K]                                         | 293(2)                                                                          |
| Crystal System                                          | Triclinic                                                                       |
| Space group                                             | P $\bar{1}$                                                                     |
| <i>a</i> / [Å]                                          | 14.0738(8)                                                                      |
| <i>b</i> / [Å]                                          | 14.4682(9)                                                                      |
| <i>c</i> / [Å]                                          | 18.1303(11)                                                                     |
| $\alpha$ / [°]                                          | 82.254(3)                                                                       |
| $\beta$ / [°]                                           | 81.010(3)                                                                       |
| $\gamma$ / [°]                                          | 68.154(2)                                                                       |
| <i>V</i> [Å <sup>3</sup> ]                              | 3372.7(4)                                                                       |
| <i>Z</i>                                                | 2                                                                               |
| D <sub>c</sub> [Mg m <sup>-3</sup> ]                    | 1.518                                                                           |
| $\mu$ / [mm <sup>-1</sup> ]                             | 1.143                                                                           |
| Reflections collected                                   | 112098                                                                          |
| Data / restraints / parameters                          | 13246 / 0 / 957                                                                 |
| Unique reflections, [R <sub>int</sub> ]                 | 13246 [0.0397]                                                                  |
| GOF = S <sub>all</sub>                                  | 1.047                                                                           |
| Final <i>R</i> indices                                  |                                                                                 |
| R <sub>1</sub> , wR <sub>2</sub> [I>2σI]                | 0.0343, 0.0808                                                                  |
| R <sub>1</sub> , wR <sub>2</sub> (all data)             | 0.0542, 0.0861                                                                  |
| $\Delta\rho_{\max}/\Delta\rho_{\min}$ [Å <sup>3</sup> ] | 0.392/-0.316                                                                    |

**Table 2. Selected bond lengths and angles (Å,°) for N17**

| Bond lengths(Å)  |            |                   |            |                   |             |
|------------------|------------|-------------------|------------|-------------------|-------------|
| Zn(1)-N(4)       | 2.0881(17) | Zn(2)-O(16)       | 2.0710(14) | Zn(3)-N(11)       | 2.0970(16)  |
| Zn(1)-N(6)       | 2.0962(18) | Zn(2)-O(1)        | 2.0879(14) | Zn(3)-N(9)        | 2.1136(17)  |
| Zn(1)-N(2)       | 2.1079(18) | Zn(2)-O(4)        | 2.0967(14) | Zn(3)-N(13)       | 2.1161(17)  |
| Zn(1)-O(1)       | 2.1555(14) | Zn(2)-O(7)        | 2.1009(14) | Zn(3)-O(16)       | 2.1609(14)  |
| Zn(1)-O(7)       | 2.1846(14) | Zn(2)-O(10)       | 2.1087(13) | Zn(3)-O(13)       | 2.1908(14)  |
| Zn(1)-O(4)       | 2.1948(14) | Zn(2)-O(13)       | 2.1171(14) | Zn(3)-O(10)       | 2.2082(13)  |
| Zn(1)-Zn(2)      | 2.9885(3)  | Zn(2)-Zn(3)       | 3.0077(3)  |                   |             |
| Bond angles(°)   |            |                   |            |                   |             |
| N(4)-Zn(1)-N(6)  | 105.07(7)  | O(16)-Zn(2)-O(7)  | 104.54(5)  | Zn(1)-Zn(2)-Zn(3) | 177.569(11) |
| N(4)-Zn(1)-N(2)  | 105.86(7)  | O(1)-Zn(2)-O(7)   | 79.12(5)   | N(11)-Zn(3)-N(9)  | 104.92(7)   |
| N(6)-Zn(1)-N(2)  | 101.51(7)  | O(4)-Zn(2)-O(7)   | 77.41(5)   | N(11)-Zn(3)-N(13) | 106.72(6)   |
| N(4)-Zn(1)-O(1)  | 92.52(6)   | O(16)-Zn(2)-O(10) | 79.10(5)   | N(9)-Zn(3)-N(13)  | 102.62(7)   |
| N(6)-Zn(1)-O(1)  | 86.04(6)   | O(1)-Zn(2)-O(10)  | 101.51(6)  | N(11)-Zn(3)-O(16) | 85.26(6)    |
| N(2)-Zn(1)-O(1)  | 157.28(6)  | O(4)-Zn(2)-O(10)  | 98.97(5)   | N(9)-Zn(3)-O(16)  | 157.46(6)   |
| N(4)-Zn(1)-O(7)  | 85.56(6)   | O(7)-Zn(2)-O(10)  | 176.17(5)  | N(13)-Zn(3)-O(16) | 93.29(6)    |
| N(6)-Zn(1)-O(7)  | 159.49(6)  | O(16)-Zn(2)-O(13) | 77.81(5)   | N(11)-Zn(3)-O(13) | 93.27(6)    |
| N(2)-Zn(1)-O(7)  | 92.08(6)   | O(1)-Zn(2)-O(13)  | 178.23(5)  | N(9)-Zn(3)-O(13)  | 84.85(6)    |
| O(1)-Zn(1)-O(7)  | 75.85(5)   | O(4)-Zn(2)-O(13)  | 103.06(5)  | N(13)-Zn(3)-O(13) | 155.71(6)   |
| N(4)-Zn(1)-O(4)  | 157.61(6)  | O(7)-Zn(2)-O(13)  | 102.35(5)  | O(16)-Zn(3)-O(13) | 74.38(5)    |
| N(6)-Zn(1)-O(4)  | 92.51(6)   | O(10)-Zn(2)-O(13) | 77.10(5)   | N(11)-Zn(3)-O(10) | 158.56(6)   |
| N(2)-Zn(1)-O(4)  | 83.54(6)   | O(16)-Zn(2)-Zn(1) | 133.38(4)  | N(9)-Zn(3)-O(10)  | 90.93(6)    |
| O(1)-Zn(1)-O(4)  | 74.68(5)   | O(1)-Zn(2)-Zn(1)  | 46.16(4)   | N(13)-Zn(3)-O(10) | 83.16(6)    |
| O(7)-Zn(1)-O(4)  | 73.65(5)   | O(4)-Zn(2)-Zn(1)  | 47.23(4)   | O(16)-Zn(3)-O(10) | 75.05(5)    |
| N(4)-Zn(1)-Zn(2) | 113.92(5)  | O(7)-Zn(2)-Zn(1)  | 46.95(4)   | O(13)-Zn(3)-O(10) | 73.54(5)    |
| N(6)-Zn(1)-Zn(2) | 115.02(5)  | O(10)-Zn(2)-Zn(1) | 131.14(4)  | N(11)-Zn(3)-Zn(2) | 114.49(5)   |
| N(2)-Zn(1)-Zn(2) | 114.20(5)  | O(13)-Zn(2)-Zn(1) | 135.61(4)  | N(9)-Zn(3)-Zn(2)  | 114.54(5)   |
| O(1)-Zn(1)-Zn(2) | 44.32(4)   | O(16)-Zn(2)-Zn(3) | 45.92(4)   | N(13)-Zn(3)-Zn(2) | 112.49(5)   |
| O(7)-Zn(1)-Zn(2) | 44.64(4)   | O(1)-Zn(2)-Zn(3)  | 131.50(4)  | O(16)-Zn(3)-Zn(2) | 43.51(4)    |
| O(4)-Zn(1)-Zn(2) | 44.53(4)   | O(4)-Zn(2)-Zn(3)  | 133.34(4)  | O(13)-Zn(3)-Zn(2) | 44.72(4)    |
| O(16)-Zn(2)-O(1) | 100.89(5)  | O(7)-Zn(2)-Zn(3)  | 134.84(4)  | O(10)-Zn(3)-Zn(2) | 44.49(3)    |
| O(16)-Zn(2)-O(4) | 177.69(5)  | O(10)-Zn(2)-Zn(3) | 47.21(4)   |                   |             |
| O(1)-Zn(2)-O(4)  | 78.19(5)   | O(13)-Zn(2)-Zn(3) | 46.73(4)   |                   |             |

**Table 3. Hydrogen bonding parameters (Å, °) of N17**

| D-H...A                      | D...A/ Å  | H...A/ Å  | D-H...A/° |
|------------------------------|-----------|-----------|-----------|
| C9-H9A...O18 <sup>i</sup>    | 3.613(3)  | 2.742(2)  | 149.8(2)  |
| C10-H10B...O17 <sup>ii</sup> | 3.253(4)  | 2.481(2)  | 136.4(2)  |
| C16-H16A...O9 <sup>iii</sup> | 3.369(4)  | 2.564(3)  | 145.1(2)  |
| C21-H21A...O11 <sup>iv</sup> | 3.285(3)  | 2.675(2)  | 123.8(2)  |
| C21-H21A...N17               | 3.350(10) | 2.680(10) | 129.6(3)  |

|                               |           |           |          |
|-------------------------------|-----------|-----------|----------|
| C25-H25A...N18 <sup>v</sup>   | 3.299(17) | 2.482(16) | 146.6(4) |
| C36-H36A...O3 <sup>vi</sup>   | 3.335(4)  | 2.571(3)  | 135.7(2) |
| C37-H37B...O3 <sup>vi</sup>   | 3.582(3)  | 2.714(2)  | 149.2(2) |
| C39-H39A...O5 <sup>vii</sup>  | 3.468(3)  | 2.549(2)  | 169.9(2) |
| C47-H47A...N15 <sup>vii</sup> | 3.436(4)  | 2.621(4)  | 141.9(2) |
| C52-H52A...O11 <sup>iv</sup>  | 3.523(4)  | 2.710(3)  | 146.5(2) |
| C55-H55B...O3 <sup>iv</sup>   | 3.398(5)  | 2.572(2)  | 144.3(3) |
| C57-H57C...O6 <sup>viii</sup> | 3.435(4)  | 2.653(2)  | 138.9(2) |
| C57-H57A...O8 <sup>ii</sup>   | 3.358(5)  | 2.577(3)  | 138.6(2) |

Equivalent positions: (i)  $x-1,+y,+z$ , (ii)  $-x+2,-y+1,-z$ , (iii)  $-x+2,-y+2,-z$ , (iv)  $-x+1,-y+1,-z+1$ , (v)  $-x+2,-y+1,-z+1$ , (vi)  $x,+y+1,+z$ , (vii)  $x+1,+y,+z$ , (viii)  $x+1,+y-1,+z$

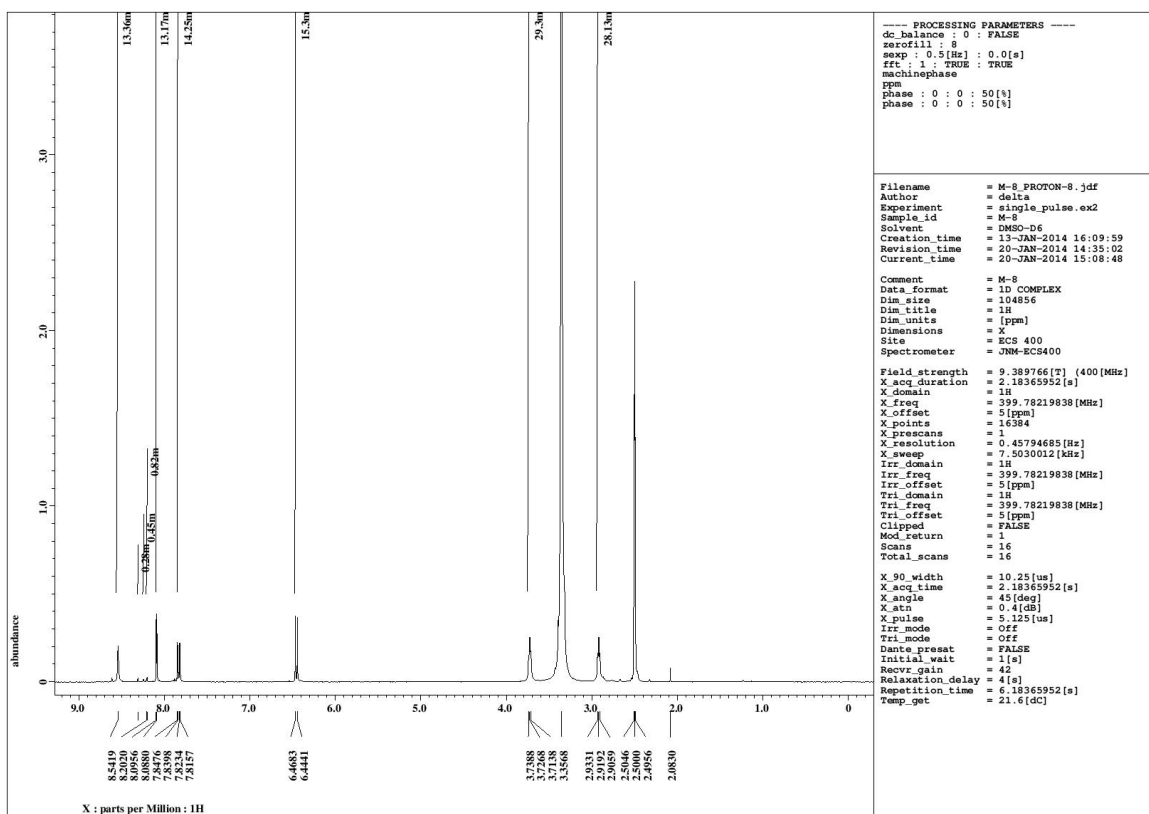

Figure S1. <sup>1</sup>H NMR of H<sub>3</sub>L<sub>1</sub>

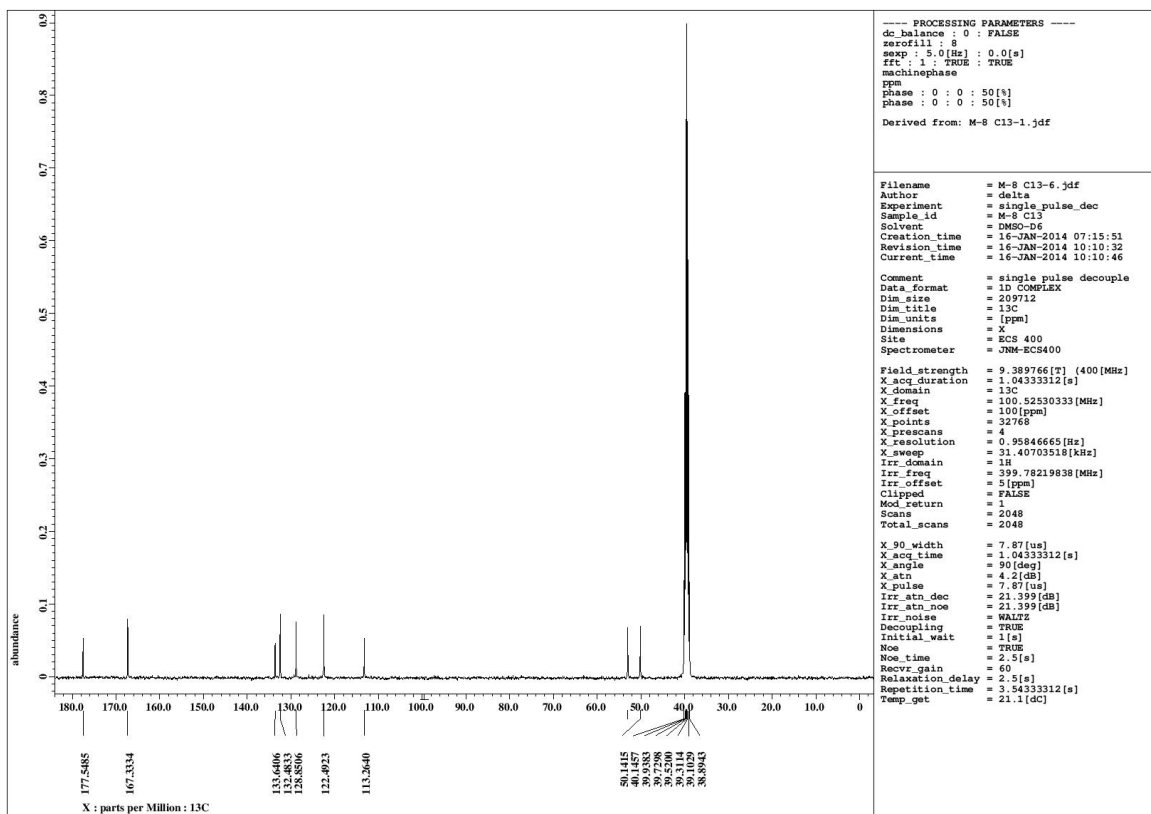

Figure S2.  $^{13}\text{C}$  NMR of  $\text{H}_3\text{L}_1$

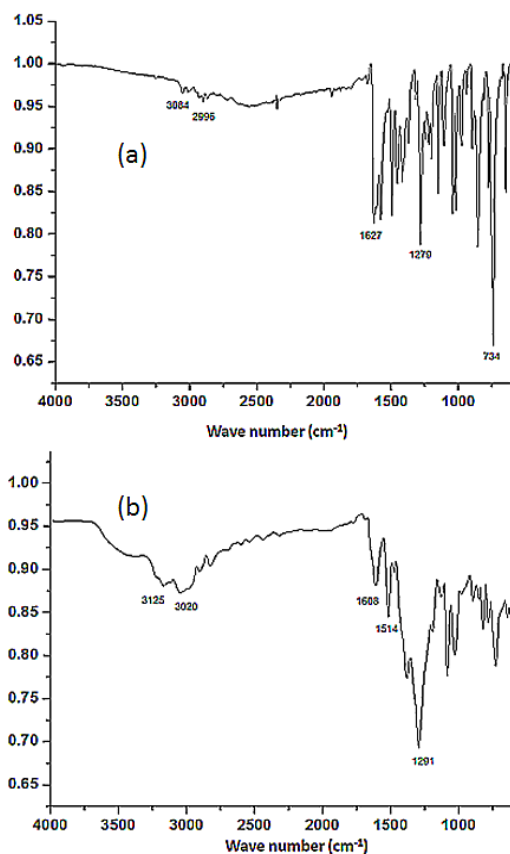

**Figure S3: IR spectra of (a) Receptor (H<sub>3</sub>L<sub>1</sub>) and (b) n17, showing clear shift in Schiff's base peak from 1627 cm<sup>-1</sup> to 1608 cm<sup>-1</sup>, marking interaction of -C=N bond with zinc metal ion.**

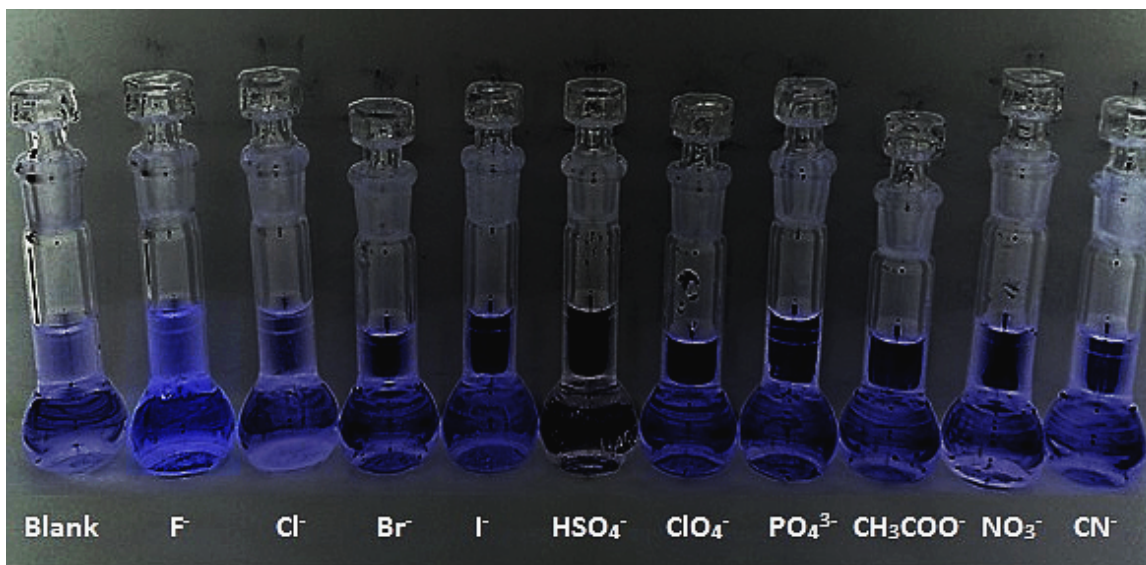

**Figure S4. Emission photograph of n17 with different anions**

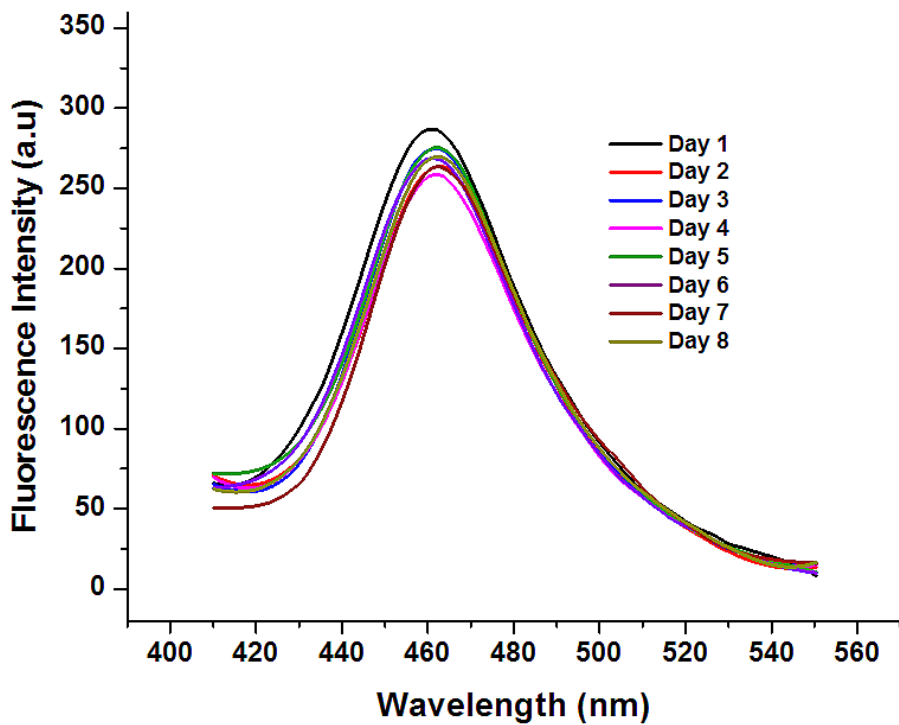

Figure S5. Emission profile of n17 nanoaggregates during various days (1-8)

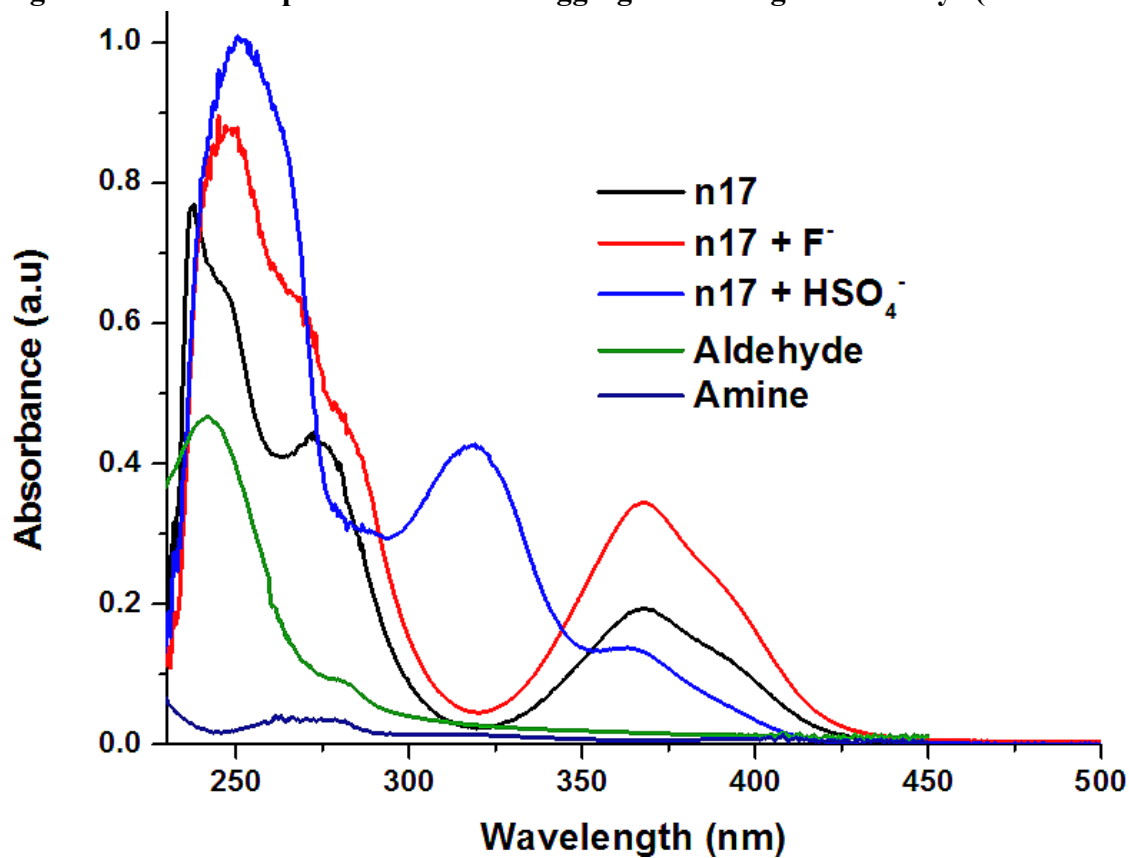

Figure S6. UV-Visible absorbance profile of n17 in presence of  $F^-$  and  $HSO_4^-$  ions

)

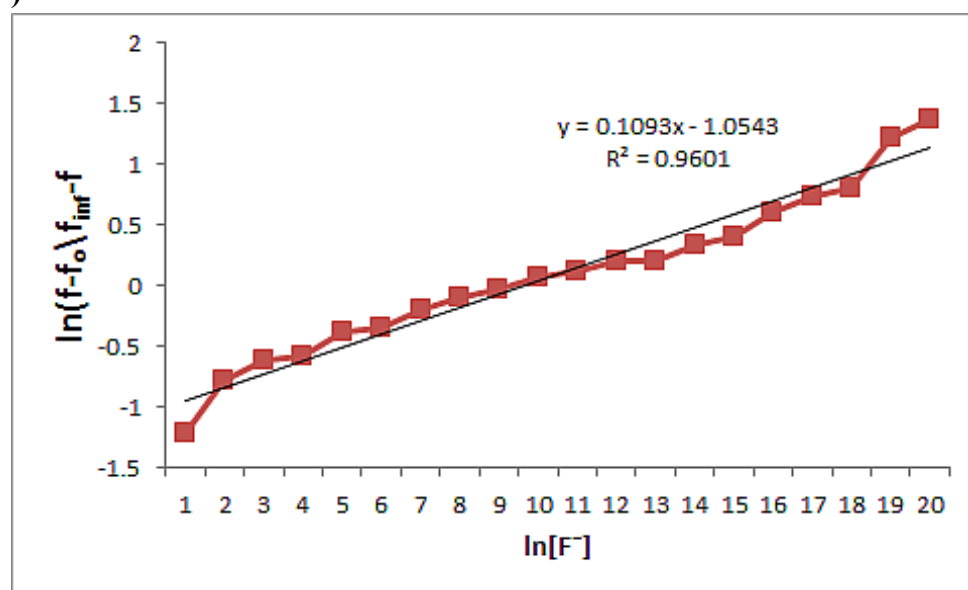

Figure S7: Lehrer Chipman plot for calculation of binding constant and stoichiometry for n17.F<sup>-</sup>.

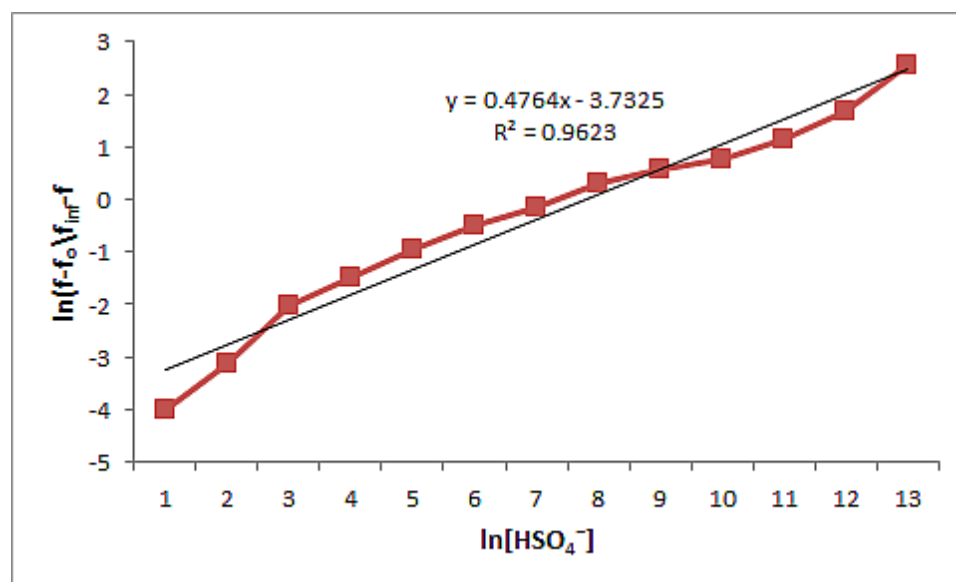

Figure S8: Lehrer Chipman plot for calculation of binding constant and stoichiometry for n17.HSO<sub>4</sub><sup>-</sup>.
